# Supplementary material for: Peptide nucleic acid-ionic self-complementary peptide conjugates: highly efficient DNA condensers with specific condensing mechanism
Source: Royal Society of Chemistry journal article supplement (doi:10.1039/c6ra26329a), 2017-01-01
Supplement: c6ra26329a1.pdf [file c6ra26329a1.pdf]

**Peptide Nucleic Acid-Ionic Self-Complementary Peptide  
Conjugates: Highly Efficient DNA Condensers with Specific  
Condensing Mechanism**

Meiwen Cao,\* Wenjing Zhao, Peng Zhou, Zilong Xie, Yawei Sun, Hai Xu\*

State Key Laboratory of Heavy Oil Processing and Centre for Bioengineering and Biotechnology,  
China University of Petroleum (East China), 66 Changjiang West Road, Qingdao 266555, P. R. China

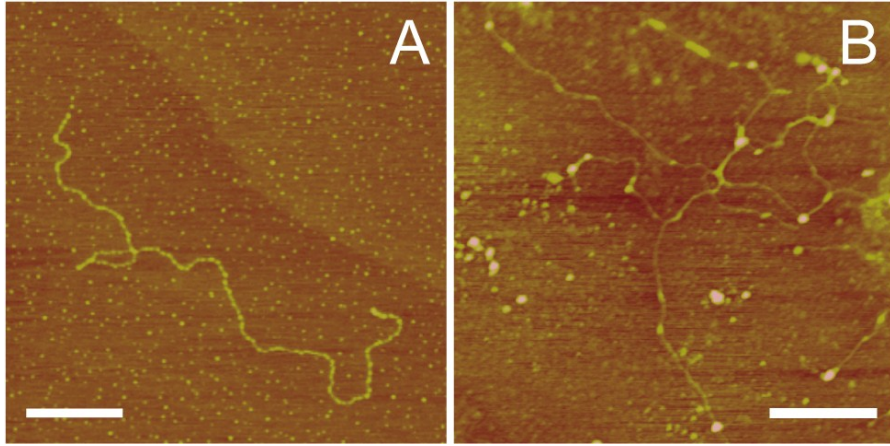

**Figure S1.** AFM height images showing the structures of  $\lambda$ -DNA ( $1.6 \times 10^{-5} \mu\text{M}$ ) in the presence of (A) PNA molecule of T'T'T' ( $1.0 \mu\text{M}$ ) and (B) ISCP molecule of (AKAE)<sub>2</sub> ( $2.0 \mu\text{M}$ ) after mixing for 4 h. Scale bar represents 500 nm for both images. The results showed that the elongated thread-like structure of  $\lambda$ -DNA still remained, suggesting that T'T'T' and ISCP molecules did not induce DNA condensation individually.

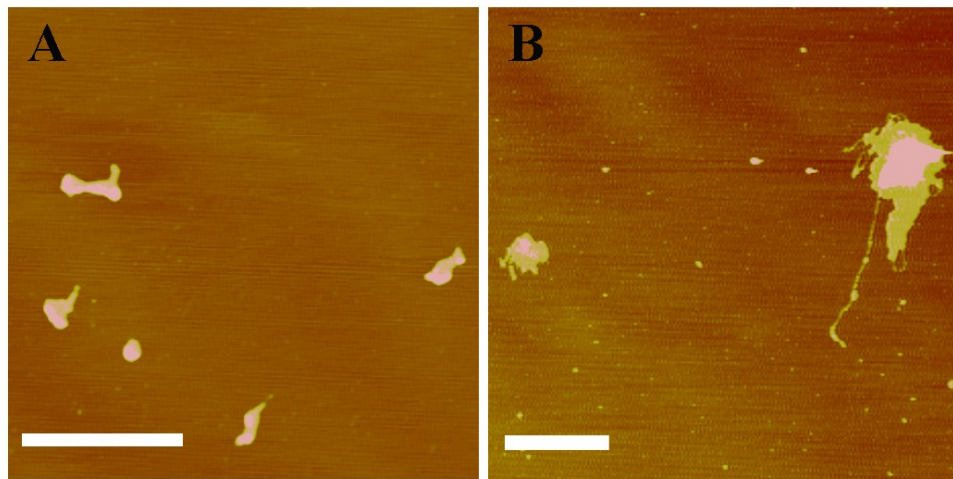

**Figure S2.** AFM height images showing the structures of  $\lambda$ -DNA ( $1.6 \times 10^{-5} \mu\text{M}$ ) in the presence of (A) CTAB and (B) PEI (+/- charge ratio 2:1) after mixing for 4 h. The scale bar represents 1000 nm for all the images.

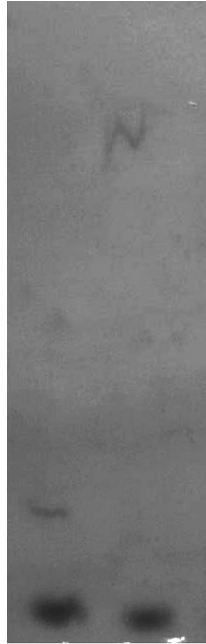

**Figure S3.** Polyacrylamide gel electrophoresis of  $d(A)_{36}$  (the left lane, 200 nM  $d(A)_{36}$ ) and the  $T'_3$ -(AKAE) $_2$ / $d(A)_{36}$  complexes (the right lane, 200 nM  $d(A)_{36}$  + 1.6  $\mu$ M  $T'_3$ -(AKAE) $_2$ ).

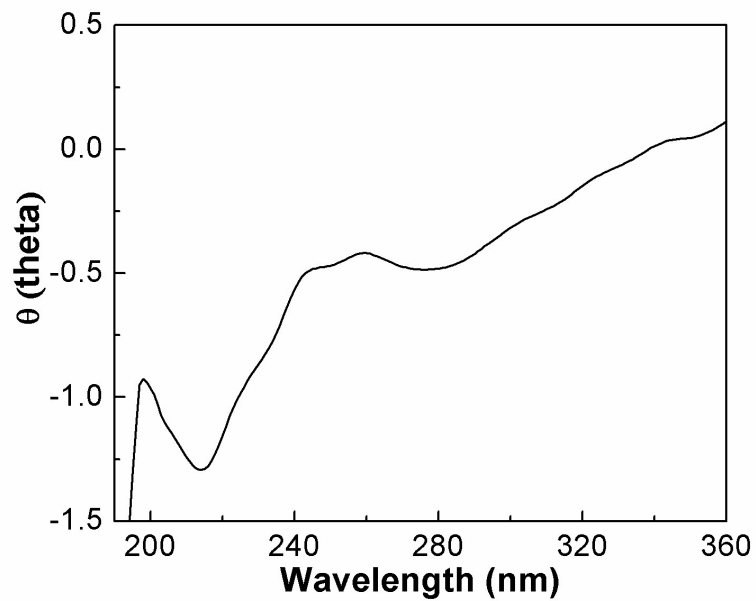

**Figure S4.** CD spectrum of  $T'_3$ -(AKAE) $_2$  (10.0  $\mu$ M).

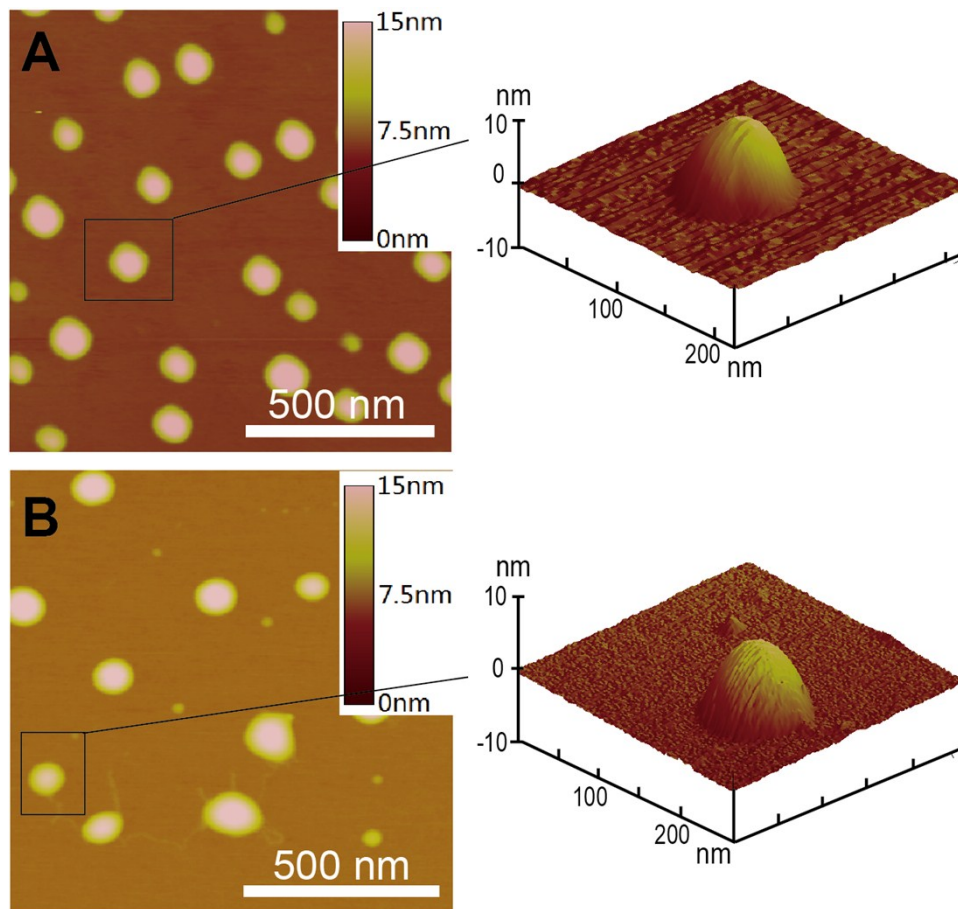

**Figure S5.** 2D and 3D AFM height images showing the structures of  $\lambda$ -DNA ( $1.6 \times 10^{-5} \mu M$ ) in the presence of (A)  $T'_3-(IKIE)_2$  ( $0.2 \mu M$ ) and (B)  $A'_3-(AKAE)_2$  ( $0.2 \mu M$ ) after mixing for 4 h. The base ratio of PNA-ISC/P/ $\lambda$ -DNA was about 1/2 in these cases.

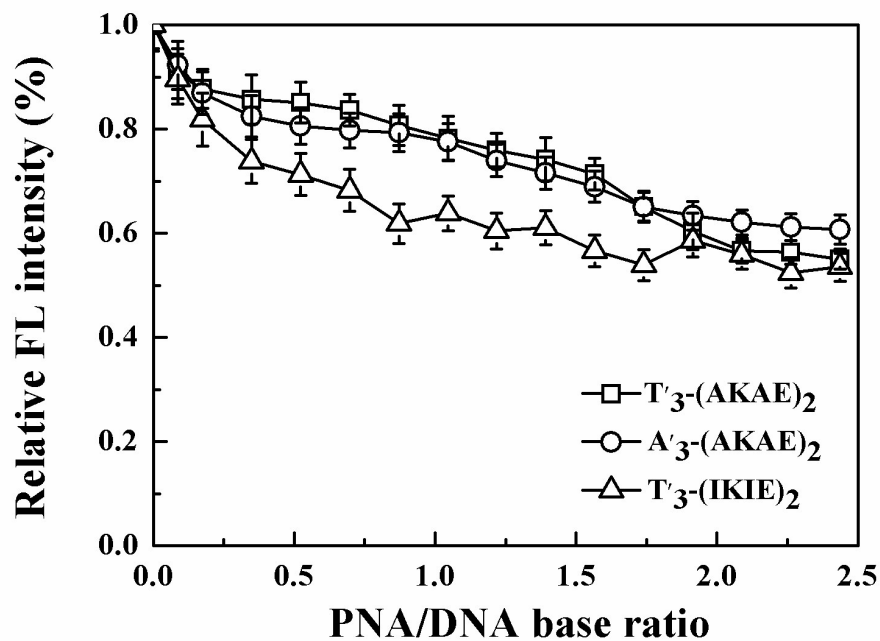

**Figure S6.** EtBr exclusion assay showing the decrease in fluorescence intensity at 610 nm due to complexation of  $\lambda$ -DNA with T'3-(AKAE)<sub>2</sub> or A'3-(AKAE)<sub>2</sub> or T'3-(IKIE)<sub>2</sub>. The fluorescence of uncomplexed  $\lambda$ -DNA was set as maximum, i.e., 100%.

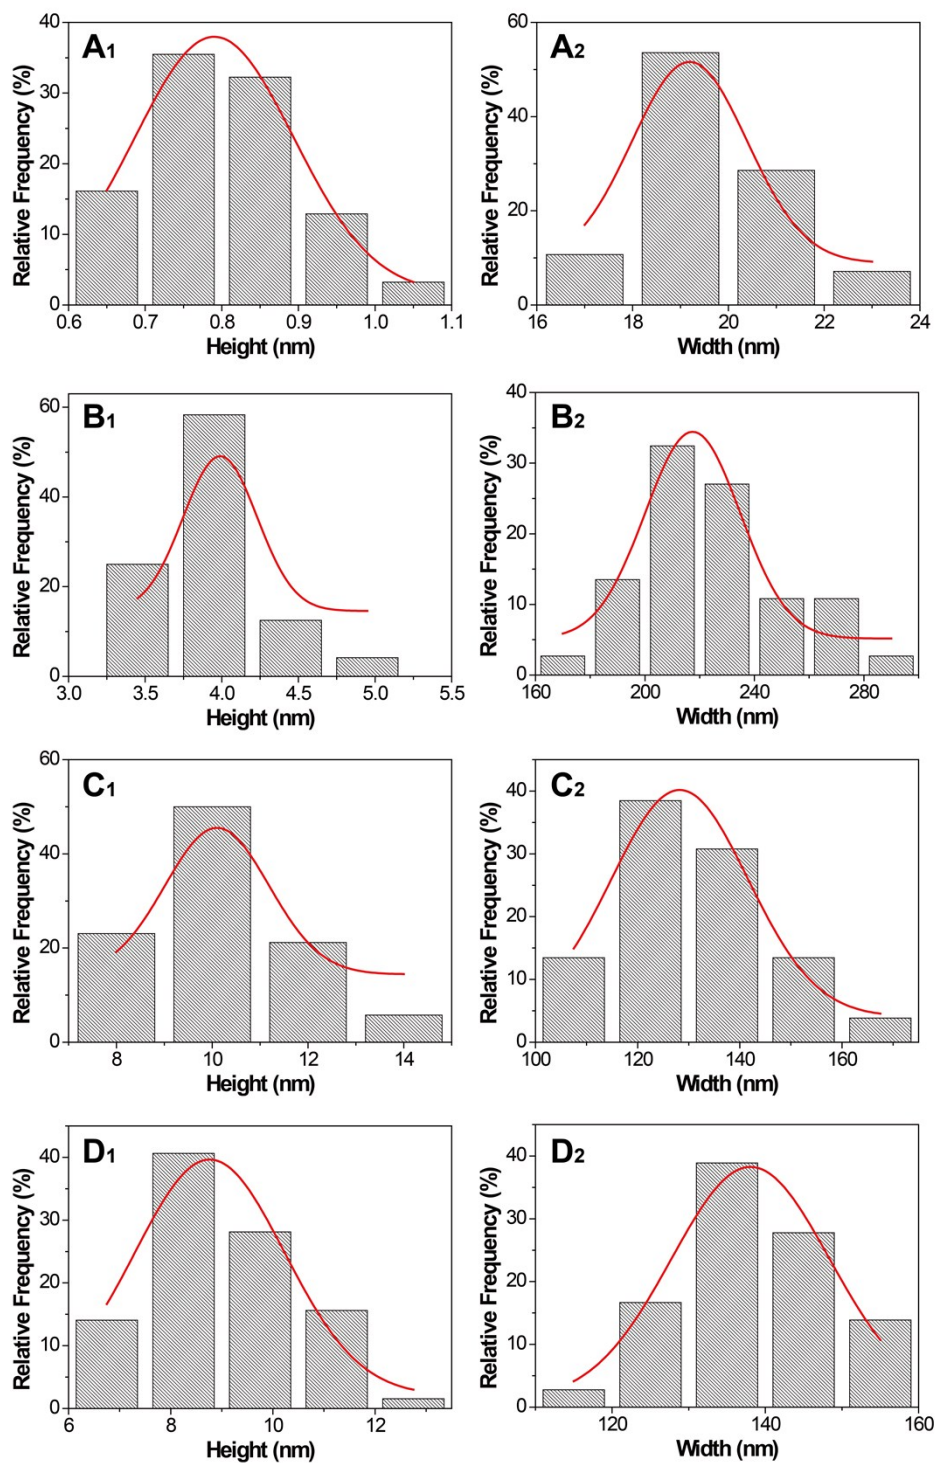

**Figure S7.** Statistical results of the size parameters obtained from AFM measurements:

(A<sub>1</sub>, A<sub>2</sub>)  $\lambda$ -DNA, (B<sub>1</sub>, B<sub>2</sub>)  $\lambda$ -DNA/ $T'_3$ -(AKAE)<sub>2</sub> globules, (C<sub>1</sub>, C<sub>2</sub>)  $\lambda$ -DNA/ $T'_3$ -(IKIE)<sub>2</sub> globules, and (D<sub>1</sub>, D<sub>2</sub>)  $\lambda$ -DNA/ $A'_3$ -(AKAE)<sub>2</sub> globules.
